# Supplementary material for: Residual Cystine Transport Activity for Specific Infantile and Juvenile CTNS Mutations in a PTEC-Based Addback Model
Source: MDPI journal article supplement (doi:10.3390/cells13070646), 2024-04-06
Supplement: s1 [file s1]

**Table S1. Overview of primer sequences**

| Target                            | cDNA/gDNA | Forward 5' → 3'          | Reverse 5' → 3'           |
|-----------------------------------|-----------|--------------------------|---------------------------|
| Woodchuck hepatitis virus<br>WPRE | gDNA      | caattccgtggtgtgtcgg      | gaaggtccgctggattgagg      |
| Hs CTNS                           | cDNA      | ccacaggcctacatgaactt     | tccactggtcgttggttag       |
| Hs $\beta$ -actin                 | gDNA      | tcacccacactgtgccatctacga | cagcggaaccgctcattgccaatgg |
| Hs $\gamma$ -actin                | cDNA      | cactgagcgaggctacagctt    | ttgatgtcgcgcacgattt       |

**Table S2. Overview of primary and secondary antibodies**

| ANTIBODY                                  | PROVIDER                      | SPECIES     | DILUTION  | APPLICATION |
|-------------------------------------------|-------------------------------|-------------|-----------|-------------|
| Anti-mouse Alexa 488                      | Invitrogen A11001             | Goat        | 1/500     | ICC         |
| Anti-rabbit Alexa 555                     | Invitrogen A21429             | Goat        | 1/500     | ICC         |
| Anti-mouse Alexa 633                      | Life Technologies A21050      | Goat        | 1/500     | ICC         |
| Phalloidin Alexa 633                      | ThermoFisher Scientific 21840 | NA          | 1/1000    | ICC         |
| Dapi                                      | Life Technologies D1306       | NA          | 1/1000    | ICC         |
| HA.11                                     | BioLegend 901515              | Mouse       | 1/1000    | ICC         |
| LA1                                       | Cell Signaling 9091           | Rabbit      | 1/200     | ICC         |
| HA.11                                     | BioLegend 901515              | Mouse       | 1/10 000  | WB          |
| HA (2-2.2.14)                             | Invitrogen 26183              | Mouse       | 1/2000    | WB          |
| vinculin                                  | Sigma V9131                   | Mouse       | 1/100 000 | WB          |
| anti-mouse polyclonal immunoglobulins/HRP | Agilent Dako P0260/P0447      | Rabbit/goat | 1/10 000  | WB          |

**FIGURE S1**

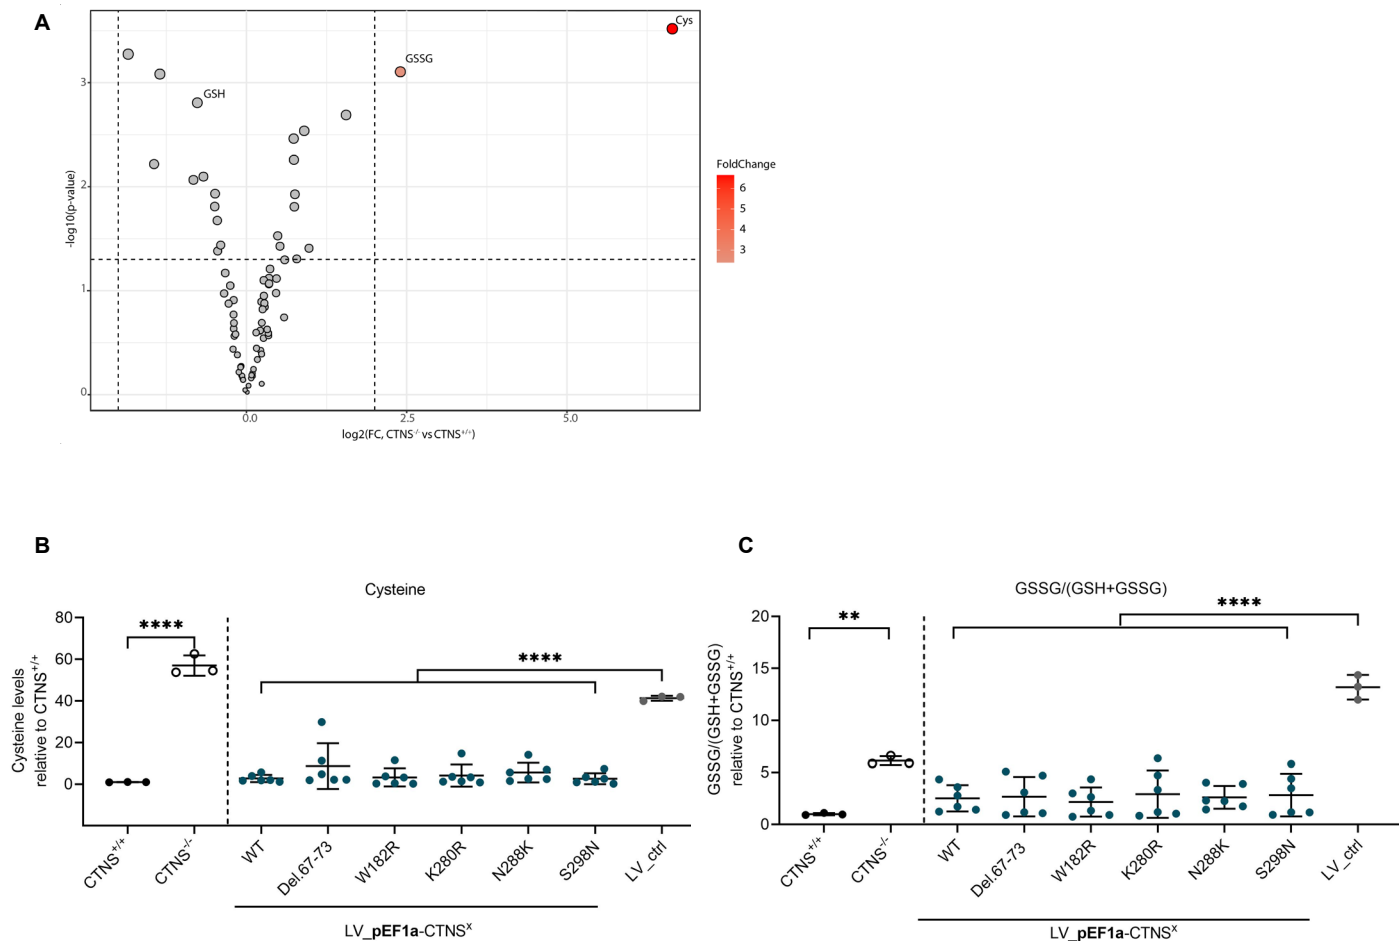

**Figure S1. *CTNS*<sup>WT</sup> and *CTNS*<sup>mutant</sup> cDNA addition after LV transduction in CRISPRed *CTNS*<sup>-/-</sup> ciPTECs reduces the intracellular cysteine and redox levels.**

(A) Volcano plot of metabolome changes in *CTNS*<sup>-/-</sup> ciPTECs (Metaboanalyst 6.0). Red dots show the differentially produced metabolites. Fold change threshold = 4.0 and P-value threshold = 0.05; unpaired t-test.

(B) Cysteine measurement (mass spectrometry) of *CTNS*<sup>-/-</sup> ciPTECs transduced with either *LV\_pEF1a-CTNS*<sup>WT</sup>, *LV\_pEF1a-CTNS*<sup>mutant</sup>, or *LV\_ctrl*. The data were normalized to protein content and are presented as the mean  $\pm$  SD (n=3 or 6 independent metabolite extracts). Statistical testing was performed with a one-way Anova, Sidak's multiple comparison test.

(C) Redox measurement, represented as  $\text{GSSG}/(\text{GSH} + \text{GSSG})$  (mass spectrometry) of *CTNS*<sup>-/-</sup> ciPTECs transduced with either *LV\_pEF1a-CTNS*<sup>WT</sup>, *LV\_pEF1a-CTNS*<sup>mutant</sup>, or *LV\_ctrl*. The data were normalized to protein content and are presented as the mean  $\pm$  SD (n=3 or 6 independent metabolite extracts). Statistical testing was performed with a one-way Anova, Sidak's multiple comparison test.

LV, lentiviral vector; p, promoter; WT, wild-type; *LV\_ctrl*, *LV\_pEF1a-eGFP*; NT, non-transduced; Cys, cysteine; GSH, reduced glutathione; GSSG, oxidized glutathione; FC, foldchange; \*\*, p < 0.01; \*\*\*\*, p < 0.0001.

**FIGURE S2**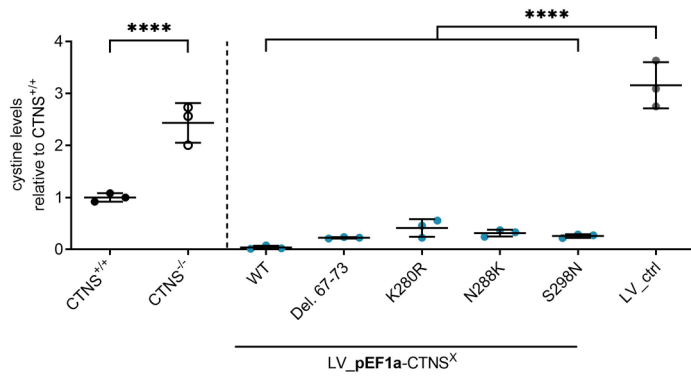

**Figure S2. *CTNS*<sup>WT</sup> and *CTNS*<sup>mutant</sup> cDNA addition after LV transduction in cystinosis patient-derived fibroblasts greatly reduces the intracellular cystine levels.** Cystine measurement (mass spectrometry) of *CTNS*<sup>-/-</sup> fibroblasts transduced with either LV\_pEF1a-*CTNS*<sup>WT</sup>, LV\_pEF1a-*CTNS*<sup>mutant</sup>, or LV\_ctrl. The data are presented as the mean  $\pm$  SD (n=3 independent metabolite extracts). Cystine ( $\mu$ M) was normalized to protein content ( $\mu$ g/ $\mu$ l). Statistical testing was performed with a one-way Anova, Sidak's multiple comparison test. LV, lentiviral vector; p, promoter; WT, wild-type; LV\_ctrl, LV\_pEF1a-eGFP; \*\*\*\*, p<0.0001.

**Figure S3. Weaker promoters leading to lower *CTNS*<sup>WT</sup> expression are still able to rescue the cystinosis phenotype**

- Effect of promoter differences on eGFP expression (flow cytometry) in *CTNS*<sup>-/-</sup> ciPTECs transduced with lentiviral vectors LV\_pEF1a-eGFP, LV\_pEFS-eGFP, LV\_pCTNS-eGFP. Promoter activities as MFI for ~30 %eGFP positive cells (considered as one integrated copy).
- Quantification of integrated copies in *CTNS*<sup>-/-</sup> ciPTECs transduced with lentiviral vectors LV\_pEF1a-*CTNS*<sup>WT</sup>, LV\_pEFS-*CTNS*<sup>WT</sup>, LV\_pCTNS-*CTNS*<sup>WT</sup> or LV\_ctrl. Integrated copies were measured by quantification of the WPRE element present in the transgene construct. The data is normalized for total levels of *ACTB* and are presented as the mean  $\pm$  SD (n=1 triplicates).
- Quantification of *CTNS*<sup>WT</sup>-3HA protein expression in *CTNS*<sup>-/-</sup> ciPTECs transduced with lentiviral vectors LV\_pEF1a-*CTNS*<sup>WT</sup>, LV\_pEFS-*CTNS*<sup>WT</sup>, LV\_pCTNS-*CTNS*<sup>WT</sup> or LV\_ctrl (n=2-3). Samples normalized for total proteins of vinculin.
- Confocal microscopy images of the immunofluorescence signal of *CTNS*<sup>WT</sup>-3HA and LAMP1 in *CTNS*<sup>-/-</sup> ciPTECs transduced with either LV\_pEF1a-*CTNS*<sup>WT</sup>, LV\_pEFS-*CTNS*<sup>WT</sup>, LV\_pCTNS-*CTNS*<sup>WT</sup> or LV\_ctrl. Nuclei were stained with DAPI. Scale bars are 10  $\mu$ M.
- Cystine measurement (mass spectrometry) of *CTNS*<sup>-/-</sup> ciPTECs transduced with LV\_pEF1a-*CTNS*<sup>WT</sup>, LV\_pEFS-*CTNS*<sup>WT</sup>, LV\_pCTNS-*CTNS*<sup>WT</sup> or LV\_ctrl. The data are presented as the mean  $\pm$  SD (n=1, 3 or 6 independent metabolite extracts). Cystine (Abundance) was normalized to protein content ( $\mu$ g/ $\mu$ l).
- Redox measurement, represented as GSSG/(GSH+GSSG) (mass spectrometry) of *CTNS*<sup>-/-</sup> ciPTECs transduced with LV\_pEF1a-*CTNS*<sup>WT</sup>, LV\_pEFS-*CTNS*<sup>WT</sup>, LV\_pCTNS-*CTNS*<sup>WT</sup> or LV\_ctrl. The data are presented as the mean  $\pm$  SD (n=1, 3 or 6 independent metabolite extracts). GSSG/(GSH+GSSG) (Abundance) was normalized to protein content ( $\mu$ g/ $\mu$ l).

LV, lentiviral vector; p, promoter; MFI, median fluorescent intensity; WT, wild-type; LV\_ctrl, LV\_pCMV-dATP13A2; NT, non-transduced

**FIGURE S3**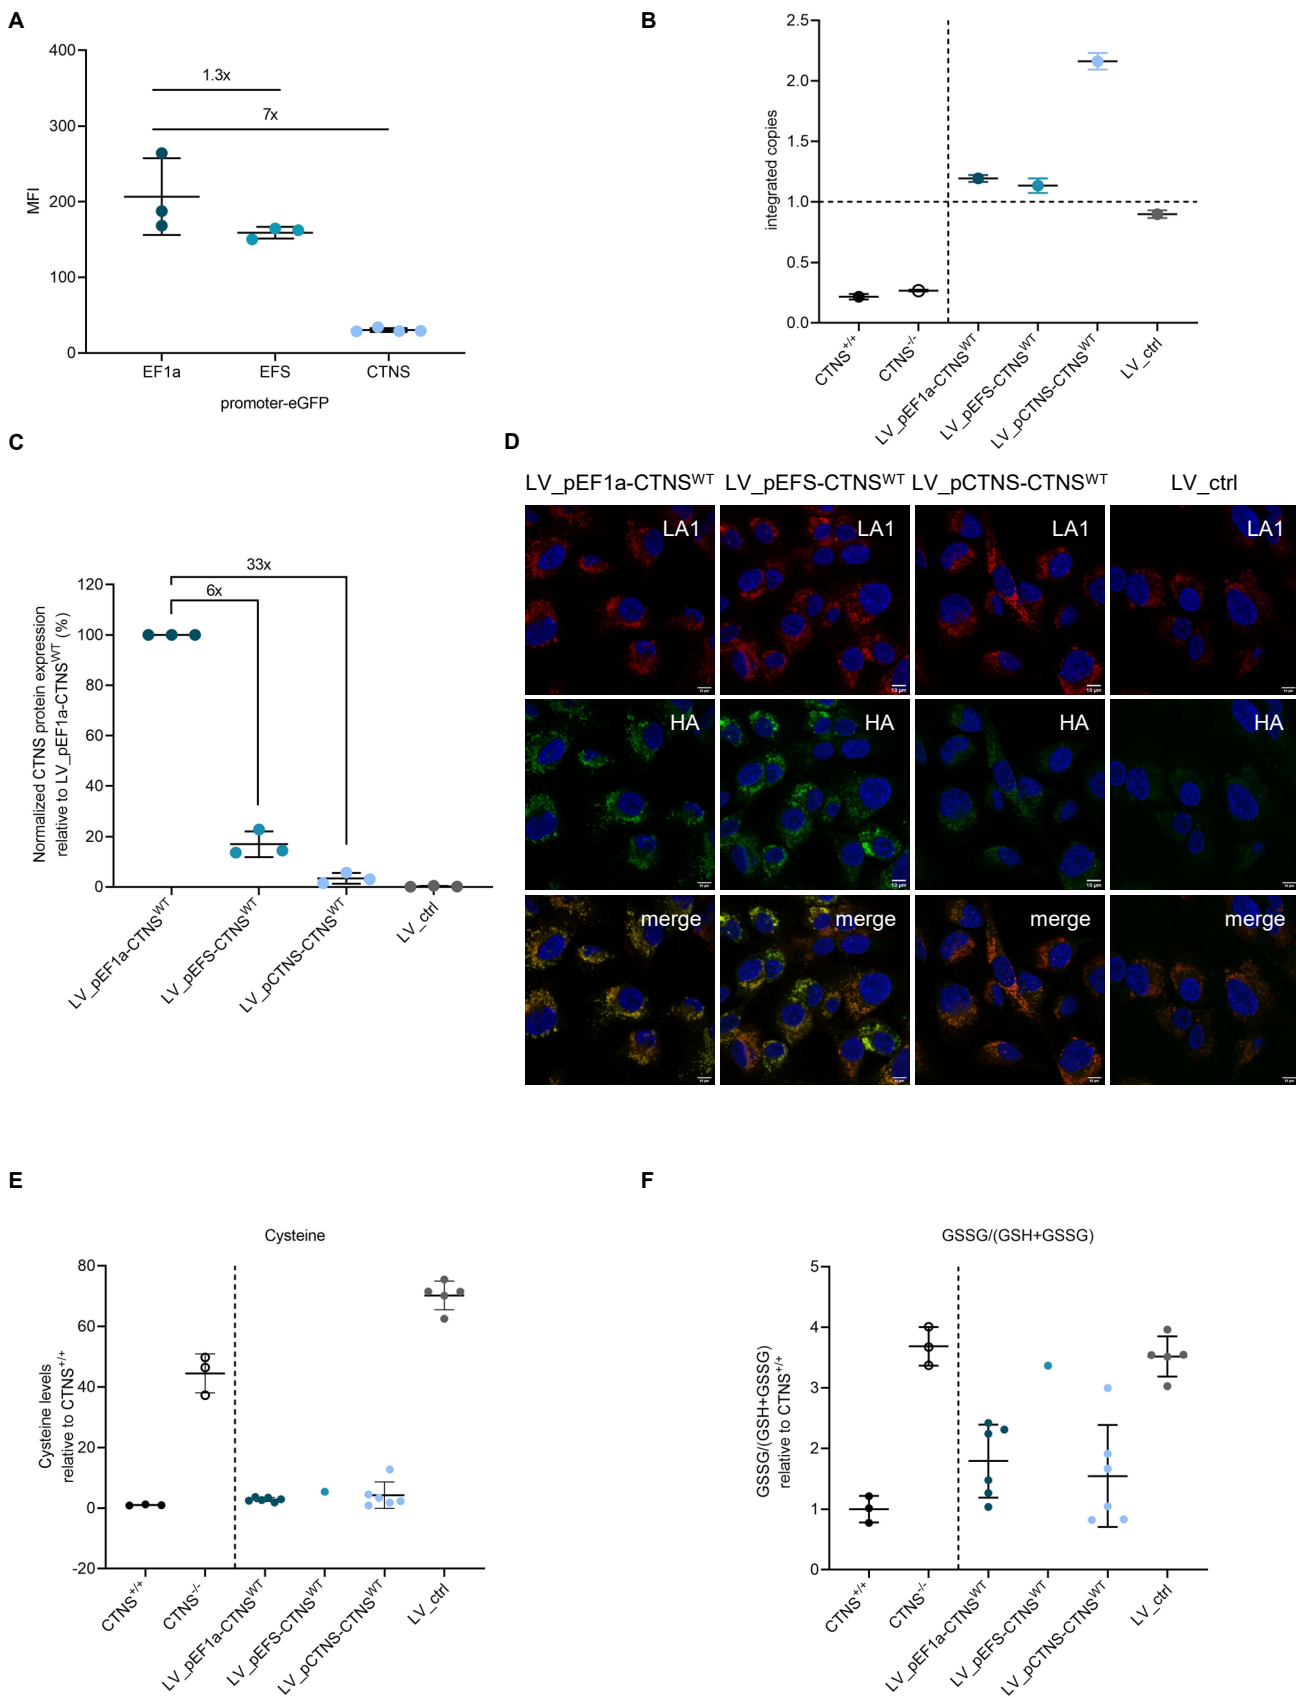

**FIGURE S4**

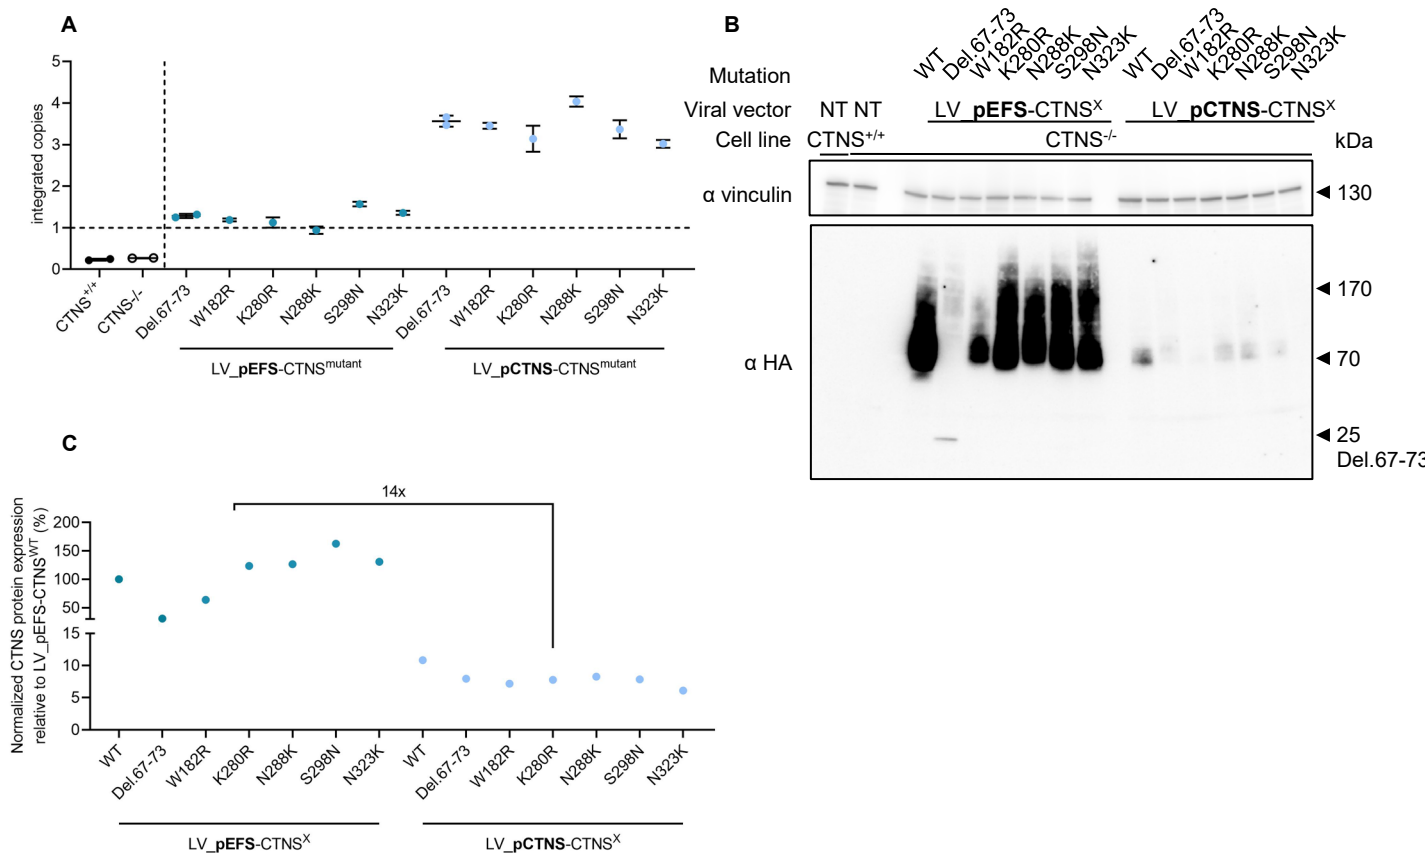

**Figure S4. Different promoters showing rescue of mutants even with low activity**

- (A) Quantification of integrated copies in *CTNS*<sup>-/-</sup> ciPTECs transduced with lentiviral vectors LV\_pEFS-*CTNS*<sup>mutant</sup> LV\_pCTNS-*CTNS*<sup>mutant</sup> or LV\_ctrl. Integrated copies were measured by quantification of the WPRE element present in the transgene construct. The data is normalized for total levels of *ACTB* and are presented as the mean  $\pm$  SD (n=1 triplicates).
- (B) Enhanced contrast of Figure 4B using ImageJ. Western blot analysis of *CTNS*<sup>WT</sup> or mutant-3HA protein expression in *CTNS*<sup>-/-</sup> ciPTECs transduced with lentiviral vectors vectors LV\_pEFS-*CTNS*<sup>WT</sup> or mutant, LV\_pCTNS-*CTNS*<sup>WT</sup> or mutant or LV\_ctrl. Samples normalized for total proteins of vinculin.
- (C) Quantification of *CTNS*<sup>mutants</sup>-3HA protein expression via Western blot analysis of *CTNS*<sup>WT</sup> or mutant-3HA protein expression in *CTNS*<sup>-/-</sup> ciPTECs transduced with lentiviral vectors vectors LV\_pEFS-*CTNS*<sup>WT</sup> or mutant, LV\_pCTNS-*CTNS*<sup>WT</sup> or mutant, or LV\_ctrl (n=2). Samples normalized for total proteins of vinculin.

LV, lentiviral vector; p, promoter; WT, wild-type; LV\_ctrl, LV\_pCMV-dATP13A2; NT, non-transduced.

FIGURE S5

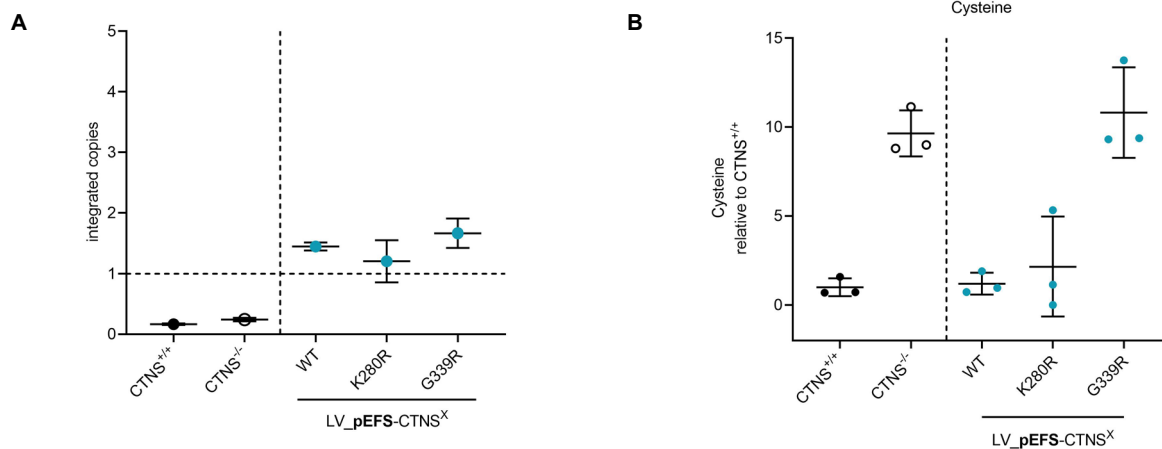

**Figure 5. G339R mutant overexpression shows no rescue in cystine accumulation upon cDNA addition in CTNS<sup>-/-</sup> ciPTECs**

(A) Quantification of integrated copies in CTNS<sup>-/-</sup> ciPTECs transduced with lentiviral vectors LV\_pEFS-CTNS<sup>WT</sup> or LV\_pEFS-CTNS<sup>K280R</sup> or G339R. Integrated copies were measured by quantification of the WPRE element present in the transgene construct. The data is normalized for total levels of *ACTB* and are presented as the mean ± SD (n=1 triplicates).

(B) Cysteine measurement (mass spectrometry) of CTNS<sup>-/-</sup> ciPTECs transduced with LV\_pEFS-CTNS<sup>WT</sup> or LV\_pEFS-CTNS<sup>K280R</sup> or G339R. The data are presented as the mean ± SD (n=3 independent metabolite extracts). Cysteine (Abundance) was normalized to protein content (μg/μl).

LV, lentiviral vector; p, promoter; WT, wild-type; \*\*\*, p<0.001; ns, nonsignificant
