# Supplementary material for: Residual Cystine Transport Activity for Specific Infantile and Juvenile CTNS Mutations in a PTEC-Based Addback Model
Source: Cells. 2024 Apr 6;13(7):646. doi: 10.3390/cells13070646 (PMC11011962; doi:10.3390/cells13070646)
Supplement: Supplementary file 1 [file cells-13-00646-s001.zip › Supported_Data_values.xlsx]

## Sheet: Figure 2B
CTNS mRNA expression (relative to CTNS +/+)
CTNS+/+			CTNS-/-			LV_ctrl			WT			S298N
mean	SD	N	mean	SD	N	mean	SD	N	mean	SD	N	mean	SD	N
1	0.0542842	3	0.7	0.0284825	3	0.8	0.0332957	3	484.4	23.3419	3	350.9	19.1784	3
									175.7	7.30562	3	183.1	7.1803	3
K280R			N288K			Del67-73			W182R
mean	SD	N	mean	SD	N	mean	SD	N	mean	SD	N
265.6	11.6937	3	106.9	4.48646	3	199	8.97496	3	178.5	7.56098	3
201.8	7.7874	3	73.9	2.85036	3	172	6.74606	3	178.5	7.39028	3

## Sheet: Figure 2E
cystine levels relative to CTNS+/+
CTNS+/+	CTNS-/-	WT	S298N	K280R	N288K	Del.67-73	W182R	LV_ctrl
1.47482	90.1356	0.8247	0.64537	0.95267	0.87281	0.81558	0.63305	132.064
0.72179	116.07	0.67899	0.63305	0.7995	0.75641	0.79428	0.60978	180.093
0.80338	149.182	0.63305	2.1914	0.76754	0.65699	0.90454	0.66055	129.354
		0.5559	3.13699	1.45095	19.2432	14.9175	0.60978
		0.81575	3.86519	0.72485	10.9696	6.30406	0.61804
		0.8232	10.4337	1.89941	44.7504	47.5445	1.20073

## Sheet: Figure 3B
CTNS mRNA expression (fold change to CTNS +/+)
LV_pEF1a-CTNSWT			CTNS+/+			CTNS-/-			LV_pCTNS-CTNSWT			LV_pEFS-CTNSWT
mean	SD	N	mean	SD	N	mean	SD	N	mean	SD	N	mean	SD	N
142.683	6.17631	3	1	0.0524843	3	0.550953	0.022593	3	20.7255	0.795542	3	29.7194	1.46631	3
140.718	9.75385	3	1	0.0160075	3	0.728668	0.0197776	3	14.4868	0.985567	3	17.3476	1.04827	3
205.074	8.87704	3							18.6788	0.366202	3	31.7056	0.567435	3

## Sheet: Figure 3D
cystine levels relative to CTNS+/+
CTNS+/+	CTNS-/-	LV_pEF1a-CTNSWT	LV_pCTNS-CTNSWT	LV_pEFS-CTNSWT	LV_ctrl
0.813	7.95	1.32	0.941	1.01	9.93
1.06	7.43	1.16	1.23	1.01	10.4
1.12	5.82	1.28	0.971	2.95	13.3
		0.651	1.04	1.81	8.73
		0.384	1.07	0.689	7.07
		0.749	0.339	0.553	8.21

## Sheet: Figure 4C
cystine levels relative to CTNS+/+
			LV_pEFS-CTNSX							LV_pCTNS-CTNSX
CTNS+/+	CTNS-/-	LV_ctrl	WT	N323K	Del67-73	N288K	K280R	S298N	W182R	WT	N323K	Del67-73	N288K	K280R	S298N	W182R
1.56767	31.1666	48.9914	0.905907	6.72045	2.0032	4.09086	2.21346	9.49279	8.01427	0.482057	1.89213	14.691	11.2013	4.52285	3.66638	4.17124
0	40.2697	40.8551	1.84908	3.80142	2.48981	3.81983	1.8274	1.48893	4.32148	0.758465	1.60057	11.8527	10.9292	3.81827	3.57754	2.87422
1.43233	41.7364	48.8758	0.68885	2.89628	2.06388	3.45088	2.67186	3.28887	2.95699	0.386648	1.64655	16.0633	11.0532	2.54928	3.23297	3.97049

## Sheet: Figure 5C
cystine levels relative to CTNS +/+
		LV_pEFS-CTNSX
CTNS+/+	CTNS-/-	WT	K280R	G339R
1.18955	34.7242	5.37259	2.59813	29.3917
1.0061	26.2558	3.49081	2.51947	26.6803
0.804351	23.3977	2.75244	2.1363	37.8042

## Sheet: Figure S1A
Metabolome analysis
ID	type	3PG	ADP	AMP	ATP	Acetyl-CoA	Arachidonic_acid	CDP	CMP	CTP	citrate	Citrulline	Coenzyme-A	erythrose4P	GA3P	ribose5P	ribulose5P	sedohept7P	DHAP	fructose1,6BP	fructose6P	fumarate	GDP	GMP	GTP	glucose6P	GSH	Gly	Itaconic_acid	Ala	Arg	Asn	Cys	Glu	Gln	Ile	lactate	Leu	Lys	malate	Met	Phe	Pro	Ser	Thr	Trp	Tyr	Val	Met_ox
+/+_1	+/+	9.83447e+06	6.30013e+07	1.10144e+07	3.79772e+08	2.9526e+06	1.09006e+06	2.34511e+06	1.07689e+06	1.55605e+07	6.44593e+08	78584.4	1.88784e+06	7.07545e+06	1.9534e+07	1.52214e+06	3.1321e+06	151424	1.92597e+07	1.18083e+08	2.17686e+06	2.46808e+07	3.87386e+06	1.95369e+07	1.98685e+07	5.43782e+06	9.00916e+07	2.60922e+06	6.00984e+06	3.11857e+06	724618	1.30509e+06	9749.48	6.55289e+08	4.8651e+06	3.2877e+07	9.22171e+08	3.28695e+07	594874	9.36116e+08	2.71588e+06	2.052e+07	1.73201e+07	1.9091e+06	6.85832e+06	1.50047e+06	8.17615e+06	7.49048e+06	78507.7
+/+_2	+/+	1.14313e+07	6.39938e+07	1.09754e+07	4.12858e+08	3.16738e+06	1.26645e+06	2.40958e+06	1.21211e+06	1.73845e+07	7.4449e+08	90945.8	2.20428e+06	6.72471e+06	2.35733e+07	1.79731e+06	3.93556e+06	257128	2.31071e+07	1.25956e+08	2.61284e+06	2.9055e+07	4.20107e+06	2.24753e+07	2.18406e+07	6.34837e+06	9.84739e+07	2.85406e+06	7.05029e+06	3.52024e+06	778281	1.37549e+06	18116.4	7.32565e+08	3.32752e+06	3.53994e+07	1031715434	35346172	638283	1126880119	2.98208e+06	2.31769e+07	1.90242e+07	2.08011e+06	7.40004e+06	1.56069e+06	8.8883e+06	7.86666e+06	103479
+/+_3	+/+	9.50652e+06	6.01449e+07	1.04589e+07	3.71699e+08	2.77563e+06	1.32776e+06	2.42715e+06	955875	1.63963e+07	6.66624e+08	71772.1	1.89606e+06	8.38019e+06	1.95997e+07	1.47955e+06	3.56517e+06	195520	1.86175e+07	1.17136e+08	2.47815e+06	2.42608e+07	3.90906e+06	2.03149e+07	2.15385e+07	5.31855e+06	8.56753e+07	2.56247e+06	6.15538e+06	3.19639e+06	734466	951977	18803.9	6.9482e+08	7.7778e+06	3.1984e+07	948521002	3.19829e+07	565677	1019653330	2.6811e+06	1.92465e+07	1.73069e+07	2.02463e+06	6.56499e+06	1.4369e+06	7.95887e+06	7.16282e+06	100929
-/-_1	-/-	9.44514e+06	6.38215e+07	7.85041e+06	323992473	2.53232e+06	1.42425e+06	2.29699e+06	541173	1.21648e+07	5.37208e+08	89757.5	1.30906e+06	6.86085e+06	1.85565e+07	1.40615e+06	3.13795e+06	263287	1.33622e+07	9.71821e+07	2.22772e+06	2.2078e+07	3.87534e+06	7.08717e+06	1.7807e+07	9.33744e+06	4.90066e+07	3.33886e+06	7.88726e+06	3.44301e+06	446764	1.80883e+06	1.33157e+06	6.31e+08	1.44994e+07	3.34245e+07	7.53205e+08	3.34216e+07	391011	9.41183e+08	2.95423e+06	2.13271e+07	1.4636e+07	3.04203e+06	7.78014e+06	1.58942e+06	8.4736e+06	8.50835e+06	98454.4
-/-_2	-/-	1.00087e+07	6.58311e+07	8.0323e+06	3.49885e+08	2.65638e+06	1.62289e+06	2.36063e+06	549335	1.38322e+07	5.8147e+08	89799.2	1.40555e+06	5.48537e+06	2.19178e+07	1.60476e+06	3.84767e+06	377757	1.5793e+07	1.06447e+08	2.70861e+06	2.5384e+07	4.01832e+06	7.0489e+06	1.94546e+07	1.09331e+07	5.24866e+07	3.55286e+06	8.92686e+06	3.82815e+06	523392	1.95603e+06	1.54581e+06	6.65983e+08	1.57641e+07	3.68385e+07	8.32151e+08	3.68355e+07	436870	1026579849	3.24668e+06	2.5687e+07	1.64794e+07	3.10942e+06	8.45891e+06	1.7472e+06	9.3933e+06	9.28417e+06	104716
-/-_3	-/-	1.20416e+07	9.53481e+07	1.21902e+07	4.42617e+08	3.2174e+06	2.05261e+06	3.42665e+06	738552	1.69785e+07	7.4545e+08	104074	1.65489e+06	7.11311e+06	2.64676e+07	2.1179e+06	4.49198e+06	399485	1.87586e+07	1.38831e+08	3.54172e+06	3.11922e+07	6.22234e+06	1.03174e+07	2.50848e+07	1.1672e+07	5.97717e+07	4.36548e+06	1.08001e+07	4.70419e+06	669318	2.33032e+06	1.78589e+06	8.94008e+08	1.66417e+07	4.61325e+07	9.42557e+08	4.61008e+07	533848	1288681516	3.96837e+06	2.79087e+07	2.01066e+07	4.00681e+06	1.03456e+07	2.09258e+06	1.167e+07	1.1274e+07	156022
[truncated: 33 more columns]

## Sheet: Figure S1B
cysteine levels relative to CTNS+/+
				LV_pEF1A-CTNSX
CTNS+/+	CTNS-/-	WT	S298N	K280R	N288K	Del.67-73	W182R	LV_ctrl
0.936484	53.8168	2.00002	3.39293	3.54765	7.00232	11.2791	3.75727	39.9201
1.09267	54.5429	1.84035	2.58856	3.25173	5.6067	4.75491	3.21981	42.0976
0.970842	62.6332	5.66406	7.367	14.7267	14.1728	29.8525	11.5123	41.8968
		3.91647	1.14663	1.2192	2.60314	2.13038	0.401443
		1.14894	0.869217	1.32485	1.53311	1.90883	0.32001
		1.70044	0.220275	0.787176	2.46584	2.10972	0.191336

## Sheet: Figure S1C
GSSG/GSH+GSSG relative to CTNS+/+
		LV_pEF1A-CTNSX
CTNS+/+	CTNS-/-	WT	S298N	K280R	N288K	Del.67-73	W182R	LV_ctrl
1.12	6.61461	3.59595	4.39764	4.71998	4.02039	5.08899	2.99623	13.2265
0.91904	5.86045	2.78273	3.48086	3.32888	2.30625	3.08405	2.63754	11.9902
0.95885	5.88888	4.33706	5.81505	6.34434	3.9097	4.70455	4.34467	14.3627
		1.71214	1.16011	1.03863	1.74444	1.17944	0.92178
		1.42875	1.17151	0.8397	1.43335	0.91906	0.74372
		1.23445	0.93354	1.19674	2.24993	1.08124	1.33477

## Sheet: Figure S2
cystine levels relative to CTNS+/+
		LV_pEF1A-CTNSX
CTNS-/-	CTNS+/+	LV_CTNSWT	CTNSS298N	CTNSK280R	CTNSN288K	CTNSDel. 67-73	LV_ctrl
2.00563	0.998131	0.0146555	0.219385	0.557136	0.245749	0.21122	2.75109
2.56281	0.919722	0.0226064	0.287148	0.226703	0.331756	0.238979	3.63179
2.73361	1.08215	0.0781862	0.272064	0.457467	0.371916	0.226939	3.09018

[truncated: 9 more sheets: Figure S3A, Figure S3B, Figure S3C, Figure S3E, Figure S3F, Figure S4A, Figure S4B, Figure S5A, Figure S5B]
